# Supplementary material for: Development of a minimal saponin vaccine adjuvant based on QS-21
Source: Springer Nature journal article supplement (doi:10.1038/nchem.1963), 2014-05-30
Supplement: 41557_2014_BFnchem1963_MOESM13_ESM.mol [file 41557_2014_BFnchem1963_MOESM13_ESM.mol]

  ChemDraw05141407552D

114125  0  0  0  0  0  0  0  0999 V2000
  -12.0164   -2.2835    0.0000 C   0  0  0  0  0  0  0  0  0  0  0  0
  -12.0164   -3.1085    0.0000 C   0  0  0  0  0  0  0  0  0  0  0  0
  -11.3019   -3.5210    0.0000 C   0  0  0  0  0  0  0  0  0  0  0  0
  -10.5874   -3.1085    0.0000 C   0  0  0  0  0  0  0  0  0  0  0  0
  -10.5874   -2.2835    0.0000 O   0  0  0  0  0  0  0  0  0  0  0  0
  -11.3019   -1.8710    0.0000 C   0  0  0  0  0  0  0  0  0  0  0  0
   -9.8753   -3.5197    0.0000 O   0  0  0  0  0  0  0  0  0  0  0  0
   -9.1633   -3.1085    0.0000 C   0  0  0  0  0  0  0  0  0  0  0  0
   -8.4488   -3.5210    0.0000 C   0  0  0  0  0  0  0  0  0  0  0  0
   -7.7343   -3.1085    0.0000 C   0  0  0  0  0  0  0  0  0  0  0  0
   -7.7343   -2.2835    0.0000 O   0  0  0  0  0  0  0  0  0  0  0  0
   -8.4488   -1.8710    0.0000 C   0  0  0  0  0  0  0  0  0  0  0  0
   -9.1633   -2.2835    0.0000 C   0  0  0  0  0  0  0  0  0  0  0  0
   -8.4488   -4.3433    0.0000 O   0  0  0  0  0  0  0  0  0  0  0  0
   -7.7367   -4.7544    0.0000 C   0  0  0  0  0  0  0  0  0  0  0  0
   -7.7367   -5.5794    0.0000 C   0  0  0  0  0  0  0  0  0  0  0  0
   -7.0223   -5.9919    0.0000 C   0  0  0  0  0  0  0  0  0  0  0  0
   -6.3078   -5.5794    0.0000 C   0  0  0  0  0  0  0  0  0  0  0  0
   -6.3078   -4.7544    0.0000 C   0  0  0  0  0  0  0  0  0  0  0  0
   -7.0223   -4.3419    0.0000 O   0  0  0  0  0  0  0  0  0  0  0  0
   -7.0223   -3.5197    0.0000 O   0  0  0  0  0  0  0  0  0  0  0  0
   -6.3102   -3.1085    0.0000 C   0  0  0  0  0  0  0  0  0  0  0  0
   -9.8753   -1.8724    0.0000 O   0  0  0  0  0  0  0  0  0  0  0  0
   -8.4488   -1.0488    0.0000 C   0  0  0  0  0  0  0  0  0  0  0  0
   -9.1609   -0.6377    0.0000 O   0  0  0  0  0  0  0  0  0  0  0  0
   -7.7367   -0.6377    0.0000 O   0  0  0  0  0  0  0  0  0  0  0  0
   -8.4488   -5.9905    0.0000 O   0  0  0  0  0  0  0  0  0  0  0  0
   -7.0223   -6.8141    0.0000 O   0  0  0  0  0  0  0  0  0  0  0  0
   -5.5957   -5.9905    0.0000 O   0  0  0  0  0  0  0  0  0  0  0  0
   -5.5957   -4.3433    0.0000 C   0  0  0  0  0  0  0  0  0  0  0  0
   -4.8837   -4.7544    0.0000 O   0  0  0  0  0  0  0  0  0  0  0  0
  -11.3019   -4.3433    0.0000 O   0  0  0  0  0  0  0  0  0  0  0  0
  -12.7284   -3.5197    0.0000 O   0  0  0  0  0  0  0  0  0  0  0  0
  -12.7284   -1.8724    0.0000 O   0  0  0  0  0  0  0  0  0  0  0  0
   -5.5957   -3.5210    0.0000 C   0  0  0  0  0  0  0  0  0  0  0  0
   -4.8813   -3.1085    0.0000 C   0  0  0  0  0  0  0  0  0  0  0  0
   -4.8813   -2.2835    0.0000 C   0  0  0  0  0  0  0  0  0  0  0  0
   -5.5957   -1.8710    0.0000 C   0  0  0  0  0  0  0  0  0  0  0  0
   -6.3102   -2.2835    0.0000 C   0  0  0  0  0  0  0  0  0  0  0  0
   -4.1668   -3.5210    0.0000 C   0  0  0  0  0  0  0  0  0  0  0  0
   -3.4523   -3.1085    0.0000 C   0  0  0  0  0  0  0  0  0  0  0  0
   -3.4523   -2.2835    0.0000 C   0  0  0  0  0  0  0  0  0  0  0  0
   -4.1668   -1.8710    0.0000 C   0  0  0  0  0  0  0  0  0  0  0  0
   -2.7378   -1.8710    0.0000 C   0  0  0  0  0  0  0  0  0  0  0  0
   -2.7378   -1.0460    0.0000 C   0  0  0  0  0  0  0  0  0  0  0  0
   -3.4523   -0.6335    0.0000 C   0  0  0  0  0  0  0  0  0  0  0  0
   -4.1668   -1.0460    0.0000 C   0  0  0  0  0  0  0  0  0  0  0  0
   -2.0234   -2.2835    0.0000 C   0  0  0  0  0  0  0  0  0  0  0  0
   -1.3089   -1.8710    0.0000 C   0  0  0  0  0  0  0  0  0  0  0  0
   -1.3089   -1.0460    0.0000 C   0  0  0  0  0  0  0  0  0  0  0  0
   -2.0234   -0.6335    0.0000 C   0  0  0  0  0  0  0  0  0  0  0  0
   -0.5944   -0.6335    0.0000 C   0  0  0  0  0  0  0  0  0  0  0  0
   -0.5944    0.1915    0.0000 C   0  0  0  0  0  0  0  0  0  0  0  0
   -1.3089    0.6040    0.0000 C   0  0  0  0  0  0  0  0  0  0  0  0
   -2.0234    0.1915    0.0000 C   0  0  0  0  0  0  0  0  0  0  0  0
   -0.8978    1.3160    0.0000 C   0  0  0  0  0  0  0  0  0  0  0  0
   -1.7200    1.3160    0.0000 C   0  0  0  0  0  0  0  0  0  0  0  0
   -6.0068   -4.2331    0.0000 C   0  0  0  0  0  0  0  0  0  0  0  0
   -5.1846   -4.2331    0.0000 C   0  0  0  0  0  0  0  0  0  0  0  0
   -4.3596   -4.2331    0.0000 O   0  0  0  0  0  0  0  0  0  0  0  0
   -4.8813   -1.4613    0.0000 C   0  0  0  0  0  0  0  0  0  0  0  0
   -2.7378   -2.6960    0.0000 C   0  0  0  0  0  0  0  0  0  0  0  0
   -2.0258   -1.4599    0.0000 C   0  0  0  0  0  0  0  0  0  0  0  0
   -0.5968   -2.2822    0.0000 O   0  0  0  0  0  0  0  0  0  0  0  0
    0.2436   -1.0917    0.0000 C   0  0  0  0  0  0  0  0  0  0  0  0
    0.6336   -1.8155    0.0000 O   0  0  0  0  0  0  0  0  0  0  0  0
    0.6755   -0.3920    0.0000 O   0  0  0  0  0  0  0  0  0  0  0  0
    1.9912   -0.3755    0.0000 C   0  0  0  0  0  0  0  0  0  0  0  0
    2.4201   -1.0802    0.0000 O   0  0  0  0  0  0  0  0  0  0  0  0
    3.2449   -1.0802    0.0000 C   0  0  0  0  0  0  0  0  0  0  0  0
    3.6408   -0.3755    0.0000 C   0  0  0  0  0  0  0  0  0  0  0  0
    3.2449    0.3293    0.0000 C   0  0  0  0  0  0  0  0  0  0  0  0
    2.4201    0.3293    0.0000 C   0  0  0  0  0  0  0  0  0  0  0  0
    3.6602   -1.7899    0.0000 C   0  0  0  0  0  0  0  0  0  0  0  0
    4.4630   -0.3755    0.0000 N   0  0  0  0  0  0  0  0  0  0  0  0
    3.6602    1.0389    0.0000 O   0  0  0  0  0  0  0  0  0  0  0  0
    2.0173    1.0460    0.0000 O   0  0  0  0  0  0  0  0  0  0  0  0
    5.1775    0.0370    0.0000 C   0  0  0  0  0  0  0  0  0  0  0  0
    5.8920   -0.3755    0.0000 C   0  0  0  0  0  0  0  0  0  0  0  0
    6.6064    0.0370    0.0000 C   0  0  0  0  0  0  0  0  0  0  0  0
    7.3209   -0.3755    0.0000 C   0  0  0  0  0  0  0  0  0  0  0  0
    8.0354    0.0370    0.0000 C   0  0  0  0  0  0  0  0  0  0  0  0
    5.1775    0.8582    0.0000 O   0  0  0  0  0  0  0  0  0  0  0  0
    1.3028    3.1085    0.0000 C   0  0  0  0  0  0  0  0  0  0  0  0
    1.3028    2.2835    0.0000 O   0  0  0  0  0  0  0  0  0  0  0  0
    2.7317    2.2835    0.0000 C   0  0  0  0  0  0  0  0  0  0  0  0
    2.7317    3.1085    0.0000 C   0  0  0  0  0  0  0  0  0  0  0  0
    2.0173    3.5210    0.0000 C   0  0  0  0  0  0  0  0  0  0  0  0
    2.0173    1.8710    0.0000 C   0  0  0  0  0  0  0  0  0  0  0  0
    3.4438    1.8724    0.0000 O   0  0  0  0  0  0  0  0  0  0  0  0
    0.5907    3.5197    0.0000 C   0  0  0  0  0  0  0  0  0  0  0  0
    2.0173    4.3433    0.0000 O   0  0  0  0  0  0  0  0  0  0  0  0
    2.7293    4.7544    0.0000 C   0  0  0  0  0  0  0  0  0  0  0  0
    3.4438    3.5197    0.0000 O   0  0  0  0  0  0  0  0  0  0  0  0
    3.4438    4.3419    0.0000 O   0  0  0  0  0  0  0  0  0  0  0  0
    4.1583    4.7544    0.0000 C   0  0  0  0  0  0  0  0  0  0  0  0
    4.1583    5.5794    0.0000 C   0  0  0  0  0  0  0  0  0  0  0  0
    3.4438    5.9919    0.0000 C   0  0  0  0  0  0  0  0  0  0  0  0
    2.7293    5.5794    0.0000 C   0  0  0  0  0  0  0  0  0  0  0  0
    4.8703    5.9905    0.0000 O   0  0  0  0  0  0  0  0  0  0  0  0
    3.4438    6.8141    0.0000 O   0  0  0  0  0  0  0  0  0  0  0  0
    2.0173    5.9905    0.0000 O   0  0  0  0  0  0  0  0  0  0  0  0
    3.2533   -2.5043    0.0000 O   0  0  0  0  0  0  0  0  0  0  0  0
    8.7475   -0.3741    0.0000 C   0  0  0  0  0  0  0  0  0  0  0  0
    9.4595    0.0370    0.0000 N   0  0  0  0  0  0  0  0  0  0  0  0
   10.1623   -0.3852    0.0000 C   0  0  0  0  0  0  0  0  0  0  0  0
   10.8023   -0.0157    0.0000 C   0  0  0  0  0  0  0  0  0  0  0  0
   10.1623   -1.1243    0.0000 O   0  0  0  0  0  0  0  0  0  0  0  0
   11.4453   -0.3869    0.0000 C   0  0  0  0  0  0  0  0  0  0  0  0
   12.0884   -0.0157    0.0000 C   0  0  0  0  0  0  0  0  0  0  0  0
   12.0884    0.7268    0.0000 C   0  0  0  0  0  0  0  0  0  0  0  0
   11.4453    1.0981    0.0000 C   0  0  0  0  0  0  0  0  0  0  0  0
   10.8023    0.7268    0.0000 C   0  0  0  0  0  0  0  0  0  0  0  0
   12.7284    1.0963    0.0000 I   0  0  0  0  0  0  0  0  0  0  0  0
  1  2  1  0      
  2  3  1  0      
  3  4  1  0      
  4  5  1  0      
  5  6  1  0      
  6  1  1  0      
  4  7  1  1      
  8  7  1  1      
  8  9  1  0      
  9 10  1  0      
 10 11  1  0      
 11 12  1  0      
 12 13  1  0      
 13  8  1  0      
  9 14  1  6      
 15 14  1  6      
 15 16  1  0      
 16 17  1  0      
 17 18  1  0      
 18 19  1  0      
 19 20  1  0      
 20 15  1  0      
 10 21  1  1      
 22 21  1  1      
 13 23  1  6      
 12 24  1  1      
 24 25  2  0      
 24 26  1  0      
 16 27  1  1      
 17 28  1  6      
 18 29  1  6      
 19 30  1  6      
 30 31  1  0      
  3 32  1  6      
  2 33  1  1      
  1 34  1  6      
 22 35  1  0      
 35 36  1  0      
 36 37  1  0      
 37 38  1  6      
 38 39  1  0      
 39 22  1  0      
 36 40  1  1      
 40 41  1  0      
 42 41  1  6      
 42 43  1  0      
 43 37  1  0      
 42 44  1  0      
 44 45  1  0      
 45 46  2  0      
 46 47  1  0      
 43 47  1  1      
 44 48  1  1      
 48 49  1  0      
 49 50  1  0      
 50 51  1  0      
 51 45  1  0      
 50 52  1  6      
 52 53  1  0      
 53 54  1  0      
 54 55  1  0      
 51 55  1  6      
 54 56  1  0      
 54 57  1  0      
 35 58  1  1      
 35 59  1  6      
 59 60  2  0      
 37 61  1  1      
 42 62  1  1      
 44 63  1  6      
 49 64  1  6      
 50 65  1  1      
 65 66  2  0      
 65 67  1  0      
 68 67  1  1      
 68 69  1  0      
 69 70  1  0      
 70 71  1  0      
 71 72  1  0      
 72 73  1  0      
 73 68  1  0      
 70 74  1  1      
 71 75  1  1      
 72 76  1  1      
 73 77  1  6      
 75 78  1  0      
 79 78  1  0      
 80 79  1  0      
 81 80  1  0      
 82 81  1  0      
 78 83  2  0      
 84 85  1  0      
 85 89  1  0      
 89 86  1  0      
 86 87  1  0      
 87 88  1  0      
 88 84  1  0      
 89 77  1  6      
 86 90  1  1      
 84 91  1  1      
 88 92  1  6      
 93 92  1  1      
 87 94  1  1      
 93 95  1  0      
 95 96  1  0      
 96 97  1  0      
 97 98  1  0      
 98 99  1  0      
 99 93  1  0      
 97100  1  6      
 98101  1  1      
 99102  1  6      
 74103  1  0      
 82104  1  0      
104105  1  0      
106107  1  0      
106108  2  0      
107109  2  0      
109110  1  0      
110111  2  0      
111112  1  0      
112113  2  0      
113107  1  0      
111114  1  0      
105106  1  0      
M  END
