# Supplementary material for: Development of a minimal saponin vaccine adjuvant based on QS-21
Source: Springer Nature journal article supplement (doi:10.1038/nchem.1963), 2014-05-30
Supplement: 41557_2014_BFnchem1963_MOESM33_ESM.mol [file 41557_2014_BFnchem1963_MOESM33_ESM.mol]

  ChemDraw05141407552D

 82 90  0  0  0  0  0  0  0  0999 V2000
   -9.3818   -4.3990    0.0000 C   0  0  0  0  0  0  0  0  0  0  0  0
   -8.6673   -4.8115    0.0000 C   0  0  0  0  0  0  0  0  0  0  0  0
   -7.9528   -4.3990    0.0000 C   0  0  0  0  0  0  0  0  0  0  0  0
   -7.9528   -3.5740    0.0000 C   0  0  0  0  0  0  0  0  0  0  0  0
   -8.6673   -3.1615    0.0000 C   0  0  0  0  0  0  0  0  0  0  0  0
   -9.3818   -3.5740    0.0000 C   0  0  0  0  0  0  0  0  0  0  0  0
   -7.2383   -4.8115    0.0000 C   0  0  0  0  0  0  0  0  0  0  0  0
   -6.5239   -4.3990    0.0000 C   0  0  0  0  0  0  0  0  0  0  0  0
   -6.5239   -3.5740    0.0000 C   0  0  0  0  0  0  0  0  0  0  0  0
   -7.2383   -3.1615    0.0000 C   0  0  0  0  0  0  0  0  0  0  0  0
   -5.8094   -3.1615    0.0000 C   0  0  0  0  0  0  0  0  0  0  0  0
   -5.8094   -2.3365    0.0000 C   0  0  0  0  0  0  0  0  0  0  0  0
   -6.5239   -1.9240    0.0000 C   0  0  0  0  0  0  0  0  0  0  0  0
   -7.2383   -2.3365    0.0000 C   0  0  0  0  0  0  0  0  0  0  0  0
   -5.0949   -3.5740    0.0000 C   0  0  0  0  0  0  0  0  0  0  0  0
   -4.3805   -3.1615    0.0000 C   0  0  0  0  0  0  0  0  0  0  0  0
   -4.3805   -2.3365    0.0000 C   0  0  0  0  0  0  0  0  0  0  0  0
   -5.0949   -1.9240    0.0000 C   0  0  0  0  0  0  0  0  0  0  0  0
   -3.6660   -1.9240    0.0000 C   0  0  0  0  0  0  0  0  0  0  0  0
   -3.6660   -1.0990    0.0000 C   0  0  0  0  0  0  0  0  0  0  0  0
   -4.3805   -0.6865    0.0000 C   0  0  0  0  0  0  0  0  0  0  0  0
   -5.0949   -1.0990    0.0000 C   0  0  0  0  0  0  0  0  0  0  0  0
   -3.9694    0.0255    0.0000 C   0  0  0  0  0  0  0  0  0  0  0  0
   -4.7916    0.0255    0.0000 C   0  0  0  0  0  0  0  0  0  0  0  0
   -9.0784   -5.5236    0.0000 C   0  0  0  0  0  0  0  0  0  0  0  0
   -8.2562   -5.5236    0.0000 C   0  0  0  0  0  0  0  0  0  0  0  0
   -7.4312   -5.5236    0.0000 O   0  0  0  0  0  0  0  0  0  0  0  0
   -7.9528   -2.7518    0.0000 C   0  0  0  0  0  0  0  0  0  0  0  0
   -5.8094   -3.9865    0.0000 C   0  0  0  0  0  0  0  0  0  0  0  0
   -5.0973   -2.7504    0.0000 C   0  0  0  0  0  0  0  0  0  0  0  0
   -2.8279   -2.3822    0.0000 C   0  0  0  0  0  0  0  0  0  0  0  0
   -2.4379   -3.1060    0.0000 O   0  0  0  0  0  0  0  0  0  0  0  0
   -3.6684   -3.5727    0.0000 O   0  0  0  0  0  0  0  0  0  0  0  0
  -10.0938   -4.8102    0.0000 O   0  0  0  0  0  0  0  0  0  0  0  0
   -2.3961   -1.6825    0.0000 O   0  0  0  0  0  0  0  0  0  0  0  0
   -1.0803   -1.6660    0.0000 C   0  0  0  0  0  0  0  0  0  0  0  0
   -0.6514   -2.3707    0.0000 O   0  0  0  0  0  0  0  0  0  0  0  0
    0.1733   -2.3707    0.0000 C   0  0  0  0  0  0  0  0  0  0  0  0
    0.5692   -1.6660    0.0000 C   0  0  0  0  0  0  0  0  0  0  0  0
    0.1733   -0.9612    0.0000 C   0  0  0  0  0  0  0  0  0  0  0  0
   -0.6514   -0.9612    0.0000 C   0  0  0  0  0  0  0  0  0  0  0  0
    0.5886   -3.0804    0.0000 C   0  0  0  0  0  0  0  0  0  0  0  0
    0.5886   -0.2516    0.0000 O   0  0  0  0  0  0  0  0  0  0  0  0
   -1.0543   -0.2445    0.0000 O   0  0  0  0  0  0  0  0  0  0  0  0
   -1.7688    1.8180    0.0000 C   0  0  0  0  0  0  0  0  0  0  0  0
   -1.7688    0.9930    0.0000 O   0  0  0  0  0  0  0  0  0  0  0  0
   -0.3398    0.9930    0.0000 C   0  0  0  0  0  0  0  0  0  0  0  0
   -0.3398    1.8180    0.0000 C   0  0  0  0  0  0  0  0  0  0  0  0
   -1.0543    2.2305    0.0000 C   0  0  0  0  0  0  0  0  0  0  0  0
   -1.0543    0.5805    0.0000 C   0  0  0  0  0  0  0  0  0  0  0  0
    0.3722    0.5819    0.0000 O   0  0  0  0  0  0  0  0  0  0  0  0
   -2.4809    2.2292    0.0000 C   0  0  0  0  0  0  0  0  0  0  0  0
   -1.0543    3.0528    0.0000 O   0  0  0  0  0  0  0  0  0  0  0  0
   -0.3422    3.4639    0.0000 C   0  0  0  0  0  0  0  0  0  0  0  0
    0.3722    2.2292    0.0000 O   0  0  0  0  0  0  0  0  0  0  0  0
    0.3722    3.0514    0.0000 O   0  0  0  0  0  0  0  0  0  0  0  0
    1.0867    3.4639    0.0000 C   0  0  0  0  0  0  0  0  0  0  0  0
    1.0867    4.2889    0.0000 C   0  0  0  0  0  0  0  0  0  0  0  0
    0.3722    4.7014    0.0000 C   0  0  0  0  0  0  0  0  0  0  0  0
   -0.3422    4.2889    0.0000 C   0  0  0  0  0  0  0  0  0  0  0  0
    1.7988    4.7000    0.0000 O   0  0  0  0  0  0  0  0  0  0  0  0
    0.3722    5.5236    0.0000 O   0  0  0  0  0  0  0  0  0  0  0  0
   -1.0543    4.7000    0.0000 O   0  0  0  0  0  0  0  0  0  0  0  0
    0.1817   -3.7948    0.0000 O   0  0  0  0  0  0  0  0  0  0  0  0
    1.3915   -1.6660    0.0000 N   0  0  0  0  0  0  0  0  0  0  0  0
    2.1061   -1.2567    0.0000 C   0  0  0  0  0  0  0  0  0  0  0  0
    2.8179   -1.6710    0.0000 C   0  0  0  0  0  0  0  0  0  0  0  0
    2.1090   -0.4331    0.0000 O   0  0  0  0  0  0  0  0  0  0  0  0
    3.6636   -1.1962    0.0000 C   0  0  0  0  0  0  0  0  0  0  0  0
    4.3781   -1.6087    0.0000 C   0  0  0  0  0  0  0  0  0  0  0  0
    5.0925   -1.1962    0.0000 C   0  0  0  0  0  0  0  0  0  0  0  0
    5.8070   -1.6087    0.0000 C   0  0  0  0  0  0  0  0  0  0  0  0
    6.5215   -1.1962    0.0000 N   0  0  0  0  0  0  0  0  0  0  0  0
    7.2359   -1.6087    0.0000 C   0  0  0  0  0  0  0  0  0  0  0  0
    7.2359   -2.4337    0.0000 O   0  0  0  0  0  0  0  0  0  0  0  0
    7.9504   -1.1962    0.0000 C   0  0  0  0  0  0  0  0  0  0  0  0
    8.6649   -1.6087    0.0000 C   0  0  0  0  0  0  0  0  0  0  0  0
    9.3794   -1.1962    0.0000 C   0  0  0  0  0  0  0  0  0  0  0  0
    9.3794   -0.3712    0.0000 C   0  0  0  0  0  0  0  0  0  0  0  0
    8.6649    0.0413    0.0000 C   0  0  0  0  0  0  0  0  0  0  0  0
    7.9504   -0.3712    0.0000 C   0  0  0  0  0  0  0  0  0  0  0  0
   10.0938    0.0413    0.0000 I   0  0  0  0  0  0  0  0  0  0  0  0
  1 34  1  1      
  1  2  1  0      
  2  3  1  0      
  3  4  1  0      
  4  5  1  6      
  5  6  1  0      
  6  1  1  0      
  3  7  1  1      
  7  8  1  0      
  9  8  1  6      
  9 10  1  0      
 10  4  1  0      
  9 11  1  0      
 11 12  1  0      
 12 13  2  0      
 13 14  1  0      
 10 14  1  1      
 11 15  1  1      
 15 16  1  0      
 16 17  1  0      
 17 18  1  0      
 18 12  1  0      
 17 19  1  6      
 19 20  1  0      
 20 21  1  0      
 21 22  1  0      
 18 22  1  6      
 21 23  1  0      
 21 24  1  0      
  2 25  1  1      
  2 26  1  6      
 26 27  2  0      
  4 28  1  1      
  9 29  1  1      
 11 30  1  6      
 16 33  1  6      
 17 31  1  1      
 31 32  2  0      
 31 35  1  0      
 36 35  1  1      
 36 37  1  0      
 37 38  1  0      
 38 39  1  0      
 39 40  1  0      
 40 41  1  0      
 41 36  1  0      
 38 42  1  1      
 39 65  1  1      
 40 43  1  1      
 41 44  1  6      
 45 46  1  0      
 46 50  1  0      
 50 47  1  0      
 47 48  1  0      
 48 49  1  0      
 49 45  1  0      
 50 44  1  6      
 47 51  1  1      
 45 52  1  1      
 49 53  1  6      
 54 53  1  1      
 48 55  1  1      
 54 56  1  0      
 56 57  1  0      
 57 58  1  0      
 58 59  1  0      
 59 60  1  0      
 60 54  1  0      
 58 61  1  6      
 59 62  1  1      
 60 63  1  6      
 42 64  1  0      
 65 66  1  0      
 66 67  1  0      
 66 68  2  0      
 67 69  1  0      
 69 70  1  0      
 70 71  1  0      
 71 72  1  0      
 72 73  1  0      
 73 74  1  0      
 74 75  2  0      
 74 76  1  0      
 76 77  2  0      
 77 78  1  0      
 78 79  2  0      
 79 80  1  0      
 80 81  2  0      
 81 76  1  0      
 79 82  1  0      
M  END
